# Supplementary material for: Pre-coating layered double hydroxide nanoparticles with albumin to improve colloidal stability and cellular uptake
Source: Royal Society of Chemistry journal article supplement (doi:10.1039/c5tb00248f), 2015-01-01
Supplement: c5tb00248f1.pdf [file c5tb00248f1.pdf]

**Table S1. Supporting data summary for reviewers**

| LDH                                  | (XRD, FTIR, SEM/TEM, PSD) Availability | Z-Average size (nm) | PDI  | ζ-potential (mV) | Note                               |
|--------------------------------------|----------------------------------------|---------------------|------|------------------|------------------------------------|
| 1. LDH                               | (XRD, FTIR, TEM, PSD)                  | 110                 | 0.14 | 43               |                                    |
| 2. sLDH                              | (XRD, FTIR, TEM, PSD)                  | 50                  | 0.17 | 39               |                                    |
| 3. ILDH                              | (TEM, PSD)                             | 210                 | 0.18 | 43               |                                    |
| 4. LDH-BSA in H <sub>2</sub> O       | (FTIR, TEM, PSD)                       | 150                 | 0.22 | -20              |                                    |
| 5. LDH-BSA in PBS                    |                                        | 180                 | 0.20 | -15              | LDH:BSA = 2:25                     |
| 6. LDH-FITC                          | (XRD, FTIR, TEM, PSD)                  | 100                 | 0.20 | 41               | 10% FITC in total anions exchanged |
| 7. LDH-FITC-BSA in H <sub>2</sub> O  |                                        | 180                 | 0.29 | -23              | As above                           |
| 8. LDH-FITC-BSA in PBS               |                                        | 167                 | 0.24 | -13              | As above                           |
| 9. LDH-LMWH                          | (XRD, FTIR, SEM, PSD)                  | 123                 | 0.23 | 35               | 10% LMWH in total anions exchanged |
| 10. LDH-LMWH-BSA in H <sub>2</sub> O |                                        | 198                 | 0.26 | -19              | As above. LDH:BSA = 2:12.5         |
| 11. LDH-LMWH-BSA in culture medium   |                                        | 165                 | 0.24 | -17              | As above. LDH:BSA = 2:12.5         |
| 12. LDH-MTX                          | (XRD, FTIR, SEM, PSD)                  | 103                 | 0.16 | 40               | 10% MTX in total anions exchanged  |
| 13. LDH-MTX-BSA in H <sub>2</sub> O  |                                        | 173                 | 0.25 | -17              | As above.                          |
| 14. LDH-MTX-BSA in culture medium    |                                        | 179                 | 0.25 | -15              | As above                           |
| 15. LDH-BSA-ODN in H <sub>2</sub> O  | (PSD)                                  | 170                 | 0.15 | -24              | LDH:ODN = 40:1                     |
| 16. LDH-BSA-ODN in PBS               | (PSD)                                  | 173                 | 0.19 | -16              | LDH:ODN = 40:1                     |
| 17. LDH-ODN (10:1)                   | (XRD, TEM)                             | 200-700             | --   | -26 to 40        | Different ODNs                     |

a) Following supplementary figures were displayed sequentially;

b) LDH:BSA mass ratio was 2:5, and otherwise indicated.

## Supplementary Figures

### 1. LDH

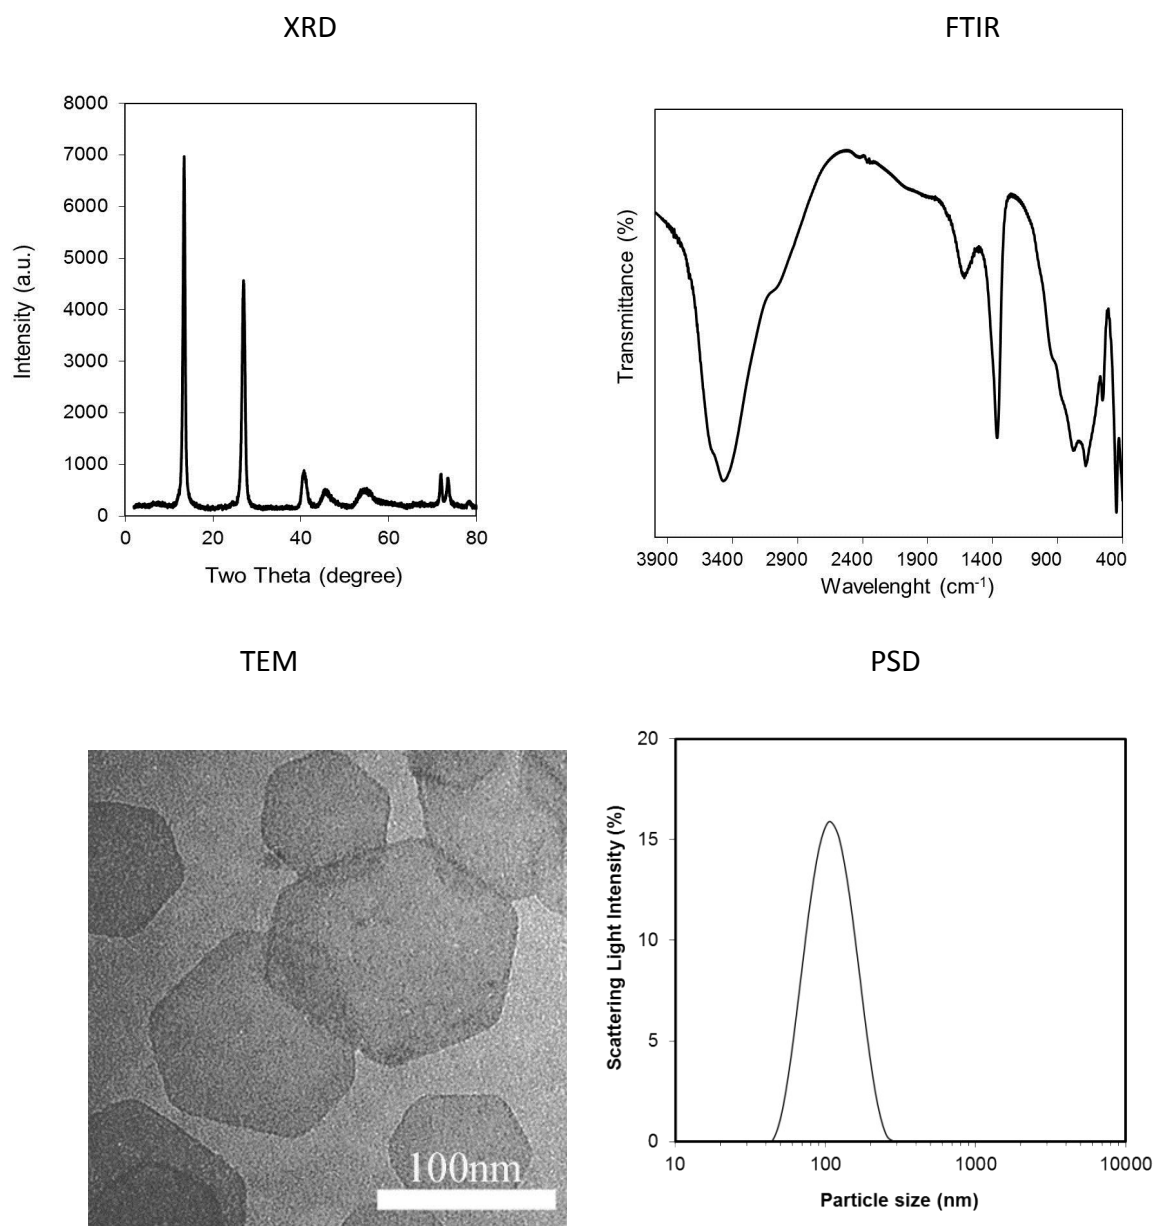

Refs:

**Xu, ZP**; Stevenson, G; Lu, CQ; Lu, GQ Max; Bartlett, PF; Gray, PP: *J. Am. Chem. Soc.* **128**, 36-37, 2006; **Xu, ZP**; Stevenson, G; Lu, CQ; Lu, GQ: *J. Phys. Chem. B* **110**, 16923-16929, 2006; **Xu, ZP**; Kurniawan, ND; Bartlett, PF; Lu, GQ Max: *Chem. Eur. J.* **13**, 2824-2830, 2007; **Xu, ZP**; Walker, TL; Liu, K-L; Cooper, HM; Lu, G.Q. Max; Bartlett, PF: *Inter. J. Nanomed.* **2**, 163-174, 2007; **Xu, ZP**; Jin, YG; Liu, SM; Hao, ZP; Lu, GQM: *J. Colloid Interface Sci.* **326**, 522-529, 2008

## 2. sLDH

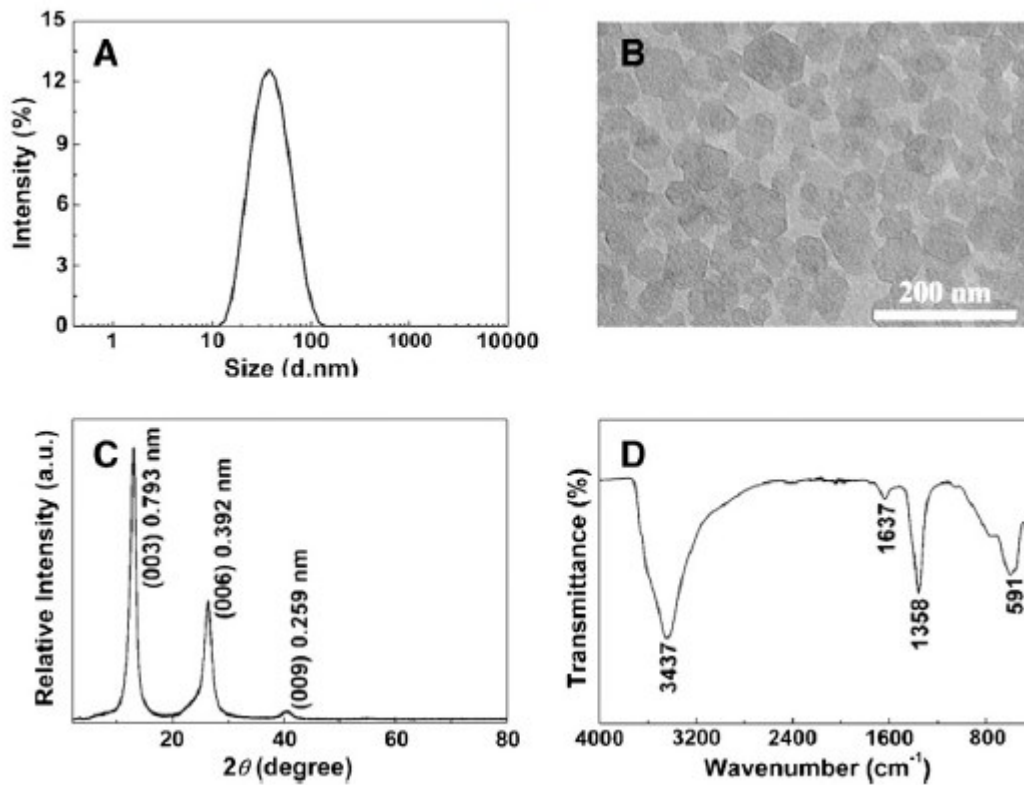

A. PSD; B. TEM; C. XRD; D. FTIR

Refs:

Dong HY; Parekh HS; **Xu ZP**: *Journal of Colloid and Interface Science*, **437**, 10-16, 2014; Dong HY; Chen M; Rahman S; Parekh HS; Cooper HM; **Xu ZP**: *Applied Clay Science*, **100**, 66-75, 2014; Chen, M; Cooper, HM; Zhou, JZ; Bartlett, PF; Lu, G.Q. (Max); **Xu, ZP**: *Journal of Colloid and Interface Science* **390**, 275-281, 2013.

### 3. ILDH

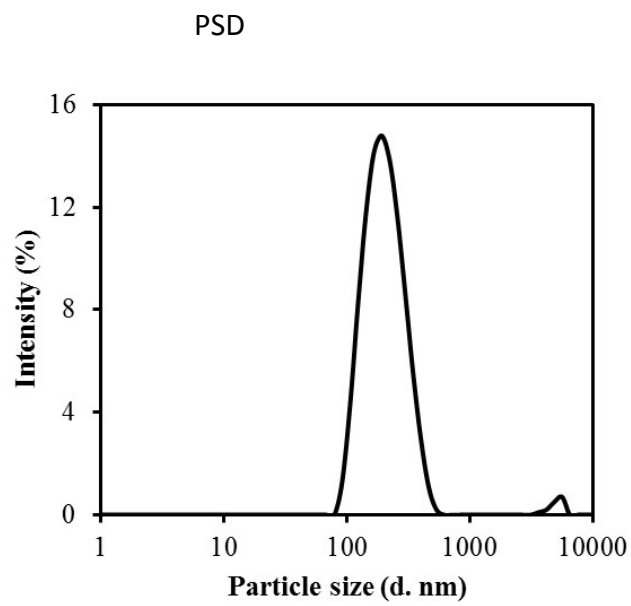

TEM

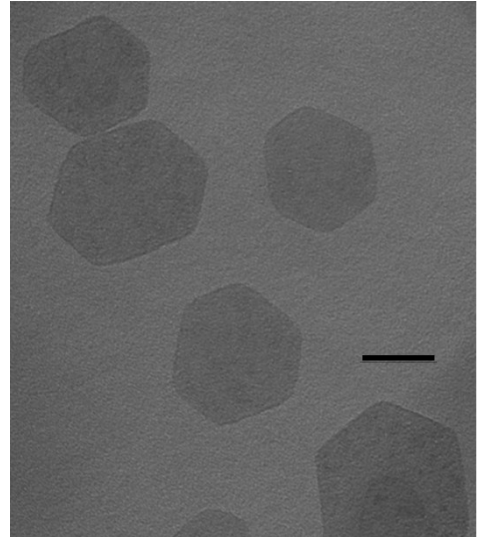

Ref:

Xu, ZP; Stevenson, G; Lu, CQ; Lu, GQ: *J. Phys. Chem. B* **110**, 16923-16929, 2006; TEM not published.

### 4. LDH-BSA in H<sub>2</sub>O

TEM (LDH-BSA 5:2 in water)

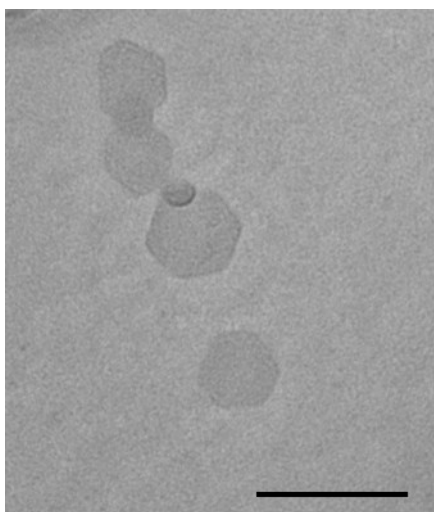

(Bar length = 200 nm)

(Figure 1E)

FTIR: Refer to Fig 5A in the manuscript

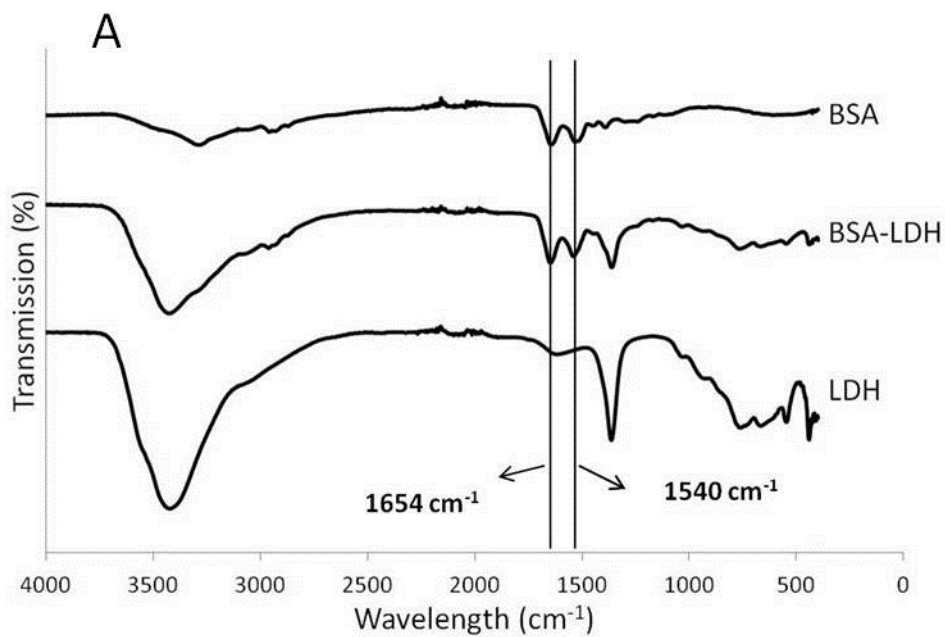

PSD: Refer to Fig 1B in the manuscript

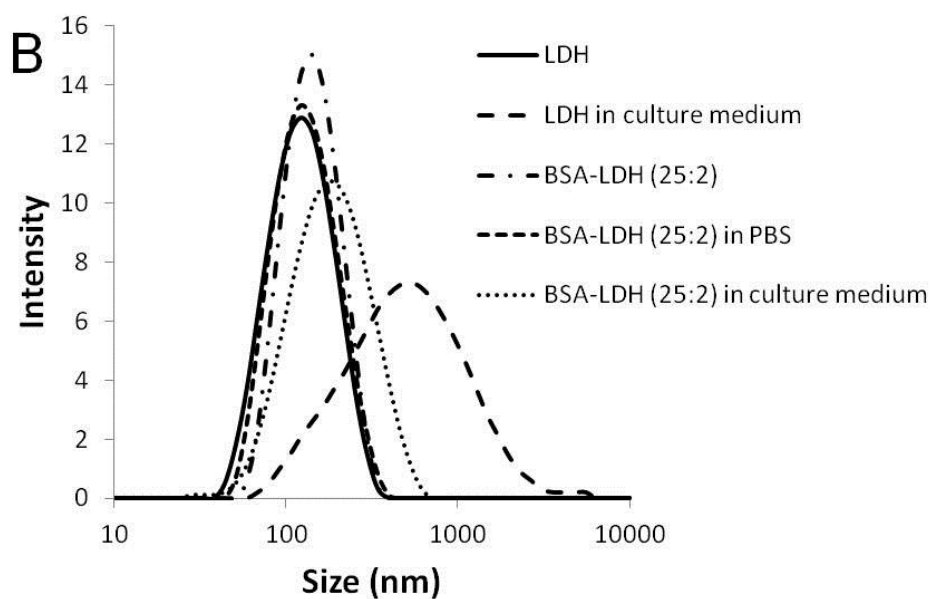

## 5. LDH-BSA in PBS

LDH in PBS (Figure 1D)

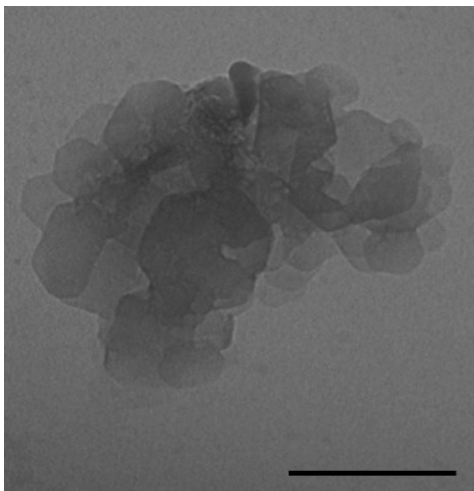

LDH-BSA in PBS (Figure 1F)

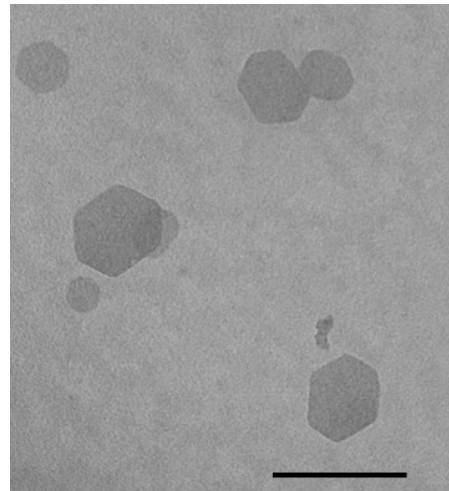

(Scale bar = 200 nm, not published yet)

PSD: refer to Fig 2A in the manuscript

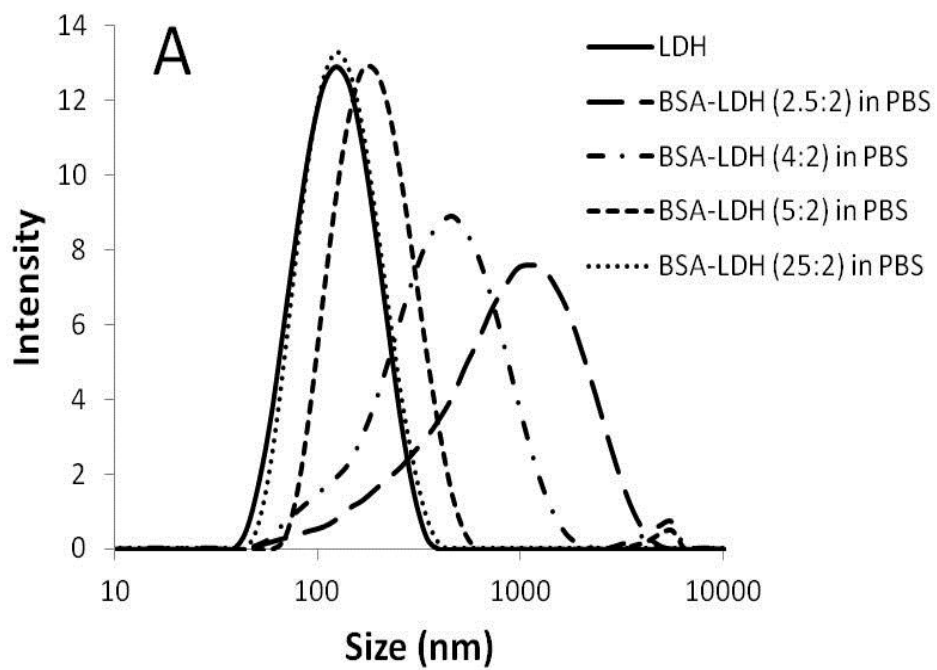

## 6. LDH-FITC

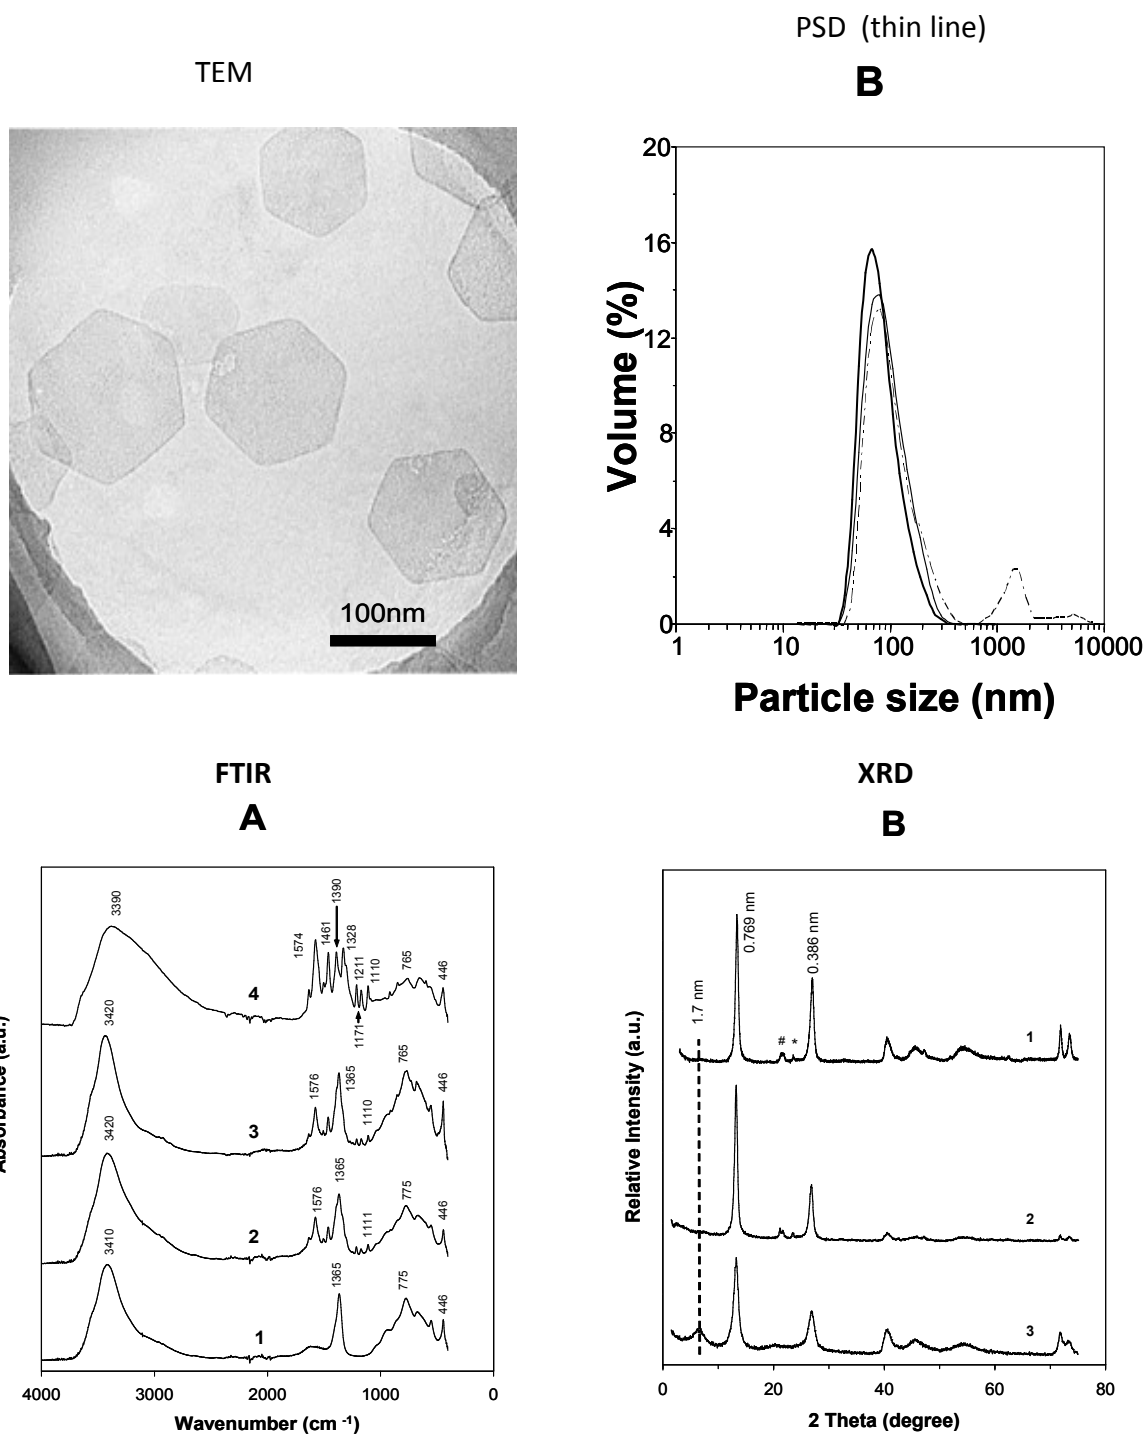

(A) Infrared spectra of (1) hexagonal LDH-Cl; (2) rod-like LDH<sub>FITC-ROD</sub> (10% Cl<sup>-</sup> equivalent FITC); (3) hexagonal LDH<sub>FITC-HEX</sub> (10% Cl<sup>-</sup> equivalent FITC); and (4) LDH<sub>FITC</sub> with 50% of Cl<sup>-</sup> ions exchanged by FITC; (B) XRD patterns of LDH-Cl/FITC samples. (1): hexagonal LDH<sub>FITC-HEX</sub> (10% Cl<sup>-</sup> equivalent FITC); (2) rod-like LDH<sub>FITC-ROD</sub> (10% Cl<sup>-</sup> equivalent FITC); and (3) LDH<sub>FITC</sub> (50% Cl<sup>-</sup> equivalent FITC). #: brucite-like phase; \*: gibbsite phase.

Ref:

**Xu, ZP**; Niebert, M; Porazik, K; Walker, TL; Cooper, HM; Middelberg, APJ; Gray, PP; Bartlett, PF; Lu, GQM: *J Control Release*. **130**, 86-94, 2008.

## 9. LDH-LMWH

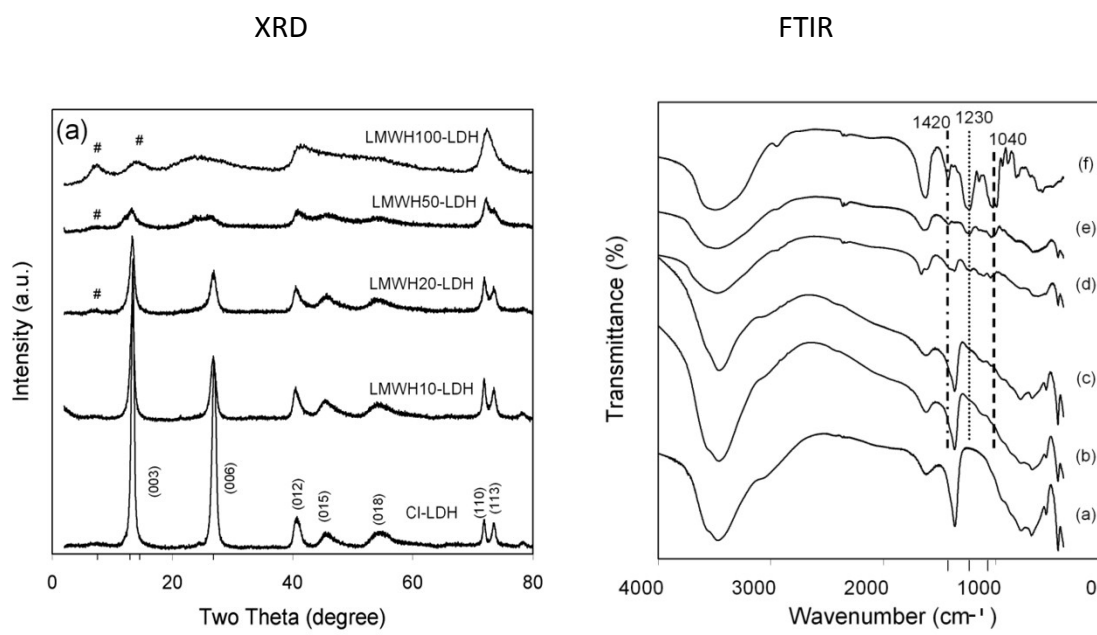

## TEM

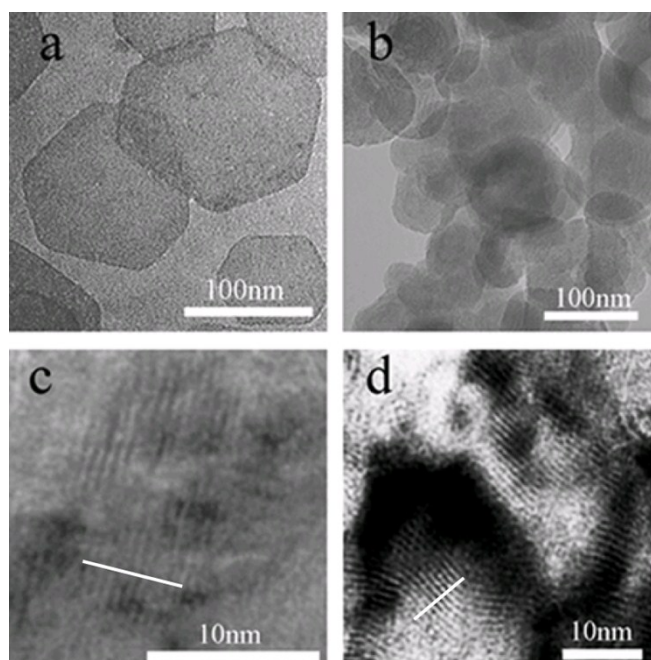

XRD, FTIR spectra and TEM of (a) Cl-LDH, (b) LMWH10-LDH, (c) LMWH20-LDH, (d) LMWH50-LDH, (e) LMWH100-LDH, (f) heparin sodium salt (MW = 4~6 kD).

Ref:

Gu, Z; Thomas, A; **Xu, ZP**; Campbell, J; Lu, GQ Max: *Chem. Mater.* **20**, 3715-3722, 2008.



## 12. LDH-MTX

TEM (bar =100 nm)

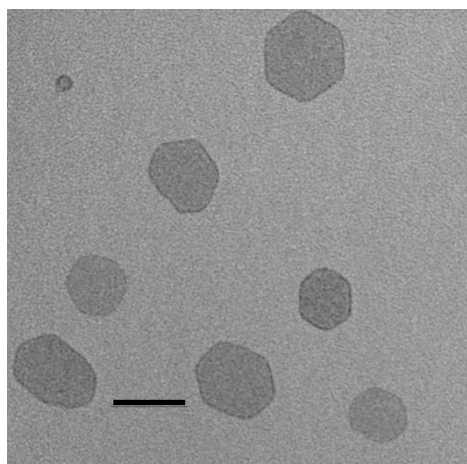

PSD

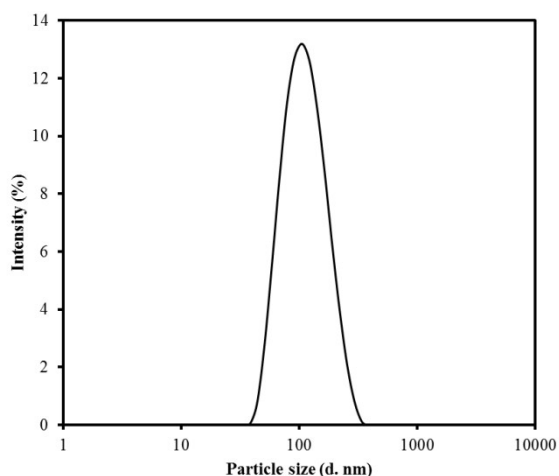

FTIR

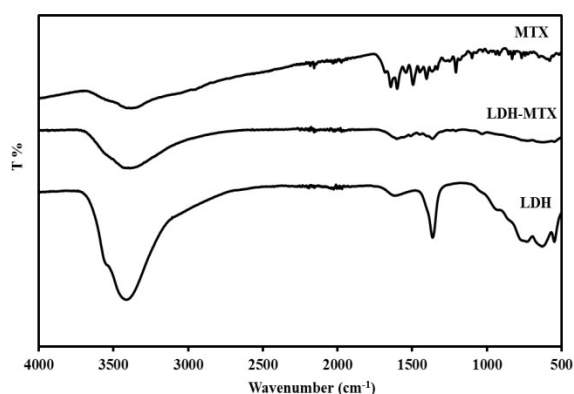

XRD

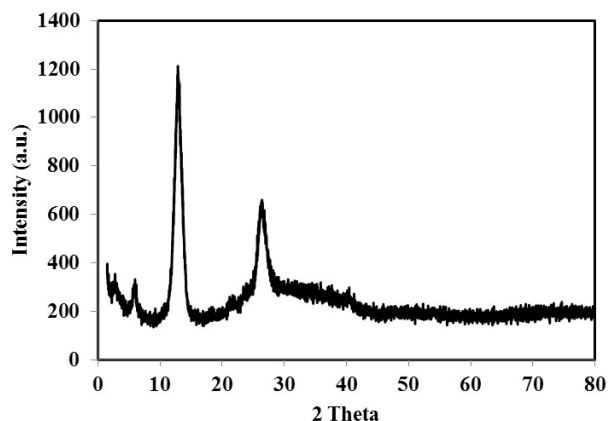

**Data were not published yet.**

Note that in this LDH, there were 90% Cl<sup>-</sup> and 10% MTX<sup>-</sup> in the interlayer to balance the positive charges in the hydroxide layers. In XRD pattern, the major phase was attributed to LDH-Cl (peaks at 14 and 28°) with a small portion of minor phase LDH-MTX (peak at 6°).

As also shown in the XRD patterns for Data 6 and 9, when there was more LMWH/FITC, the XRD peak belonging to LDH-LMWH/FITC became more obvious. However, the aggregation of LDH-LMWH/FITC nanoparticles became severe, increasing the particle size and losing the monodispersivity (PCS data not shown). Therefore, for a particular drug, LDH-drug nanoparticles are normally dispersed well in aqueous suspension when the drug loading in LDH is equivalent to replacing 10-20% of total Cl<sup>-</sup> in precursor LDH-Cl, which avoids any aggregation while the drug loading is high enough for subsequent biological tests. So in this research, we chose this loading range (Refer to Section 2.2.2 in the main text) in order to obtain well dispersed LDH suspensions.

15,16. BSA-LDH-ODN (100:40:1) in water, PBS and culture medium

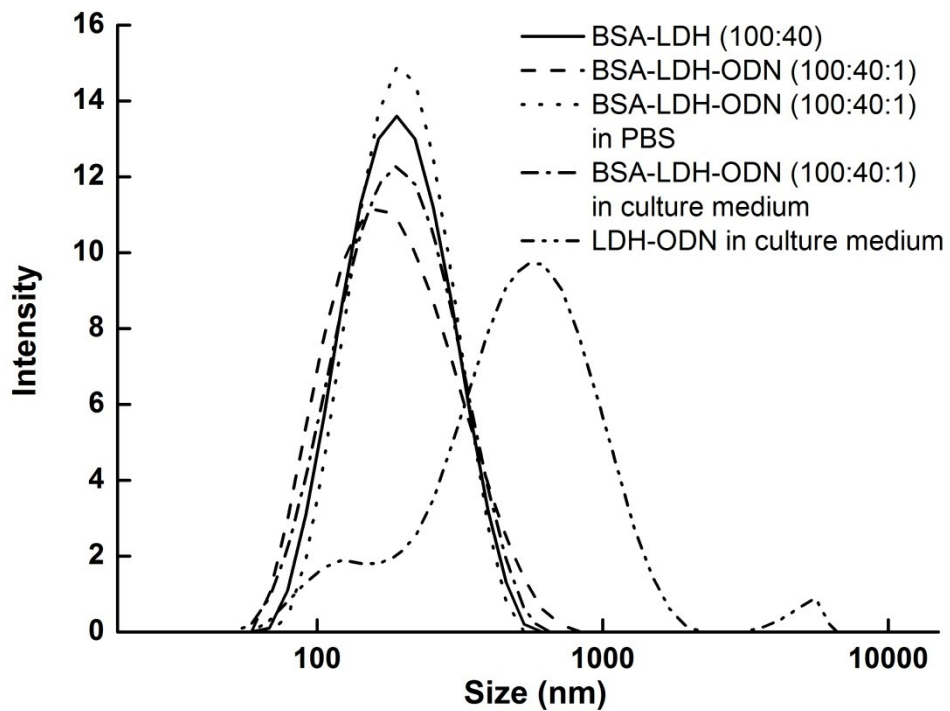

In the manuscript, Fig.3 was changed to the graph above (BSA-LDH-ODN in PBS was added):

## 17. LDH-ODN

(A)

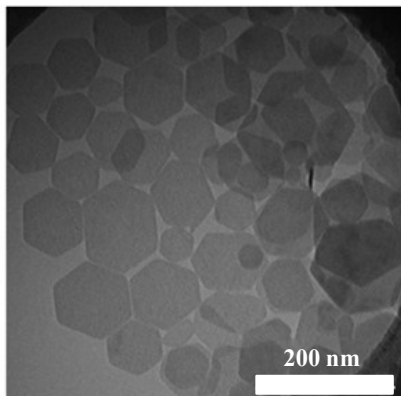

(B)

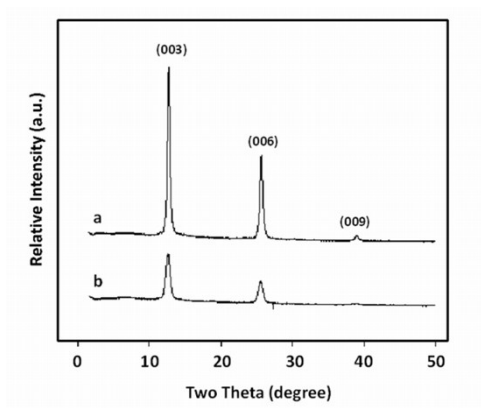

(C)

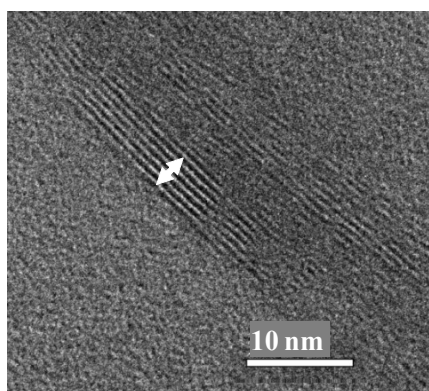

(D)

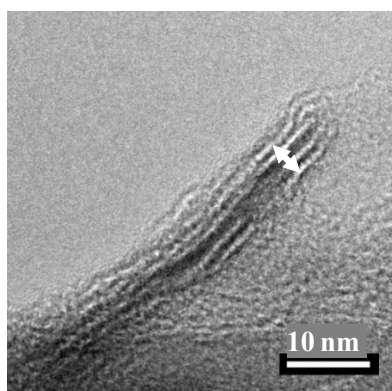

(A) TEM image of LDHs; (B) XRD patterns of LDH (a) and dsDNA-Htt#1-LDH (b); High resolution TEM images of LDH (C) and dsDNA-Htt#1-LDH (D), Bars; interlayer width without dsDNA intercalation, arrow; expansion due to dsDNA intercalation.

Ref:

Wong, YY; Cooper, HM; Zhang, K; Chen, M; Bartlett, PF; **Xu, ZP**: *J Colloid Interface Sci.* **369**, 453-459, 2012.
